# Supplementary material for: Chronic Activation of Liver X Receptor Induces β-Cell Apoptosis Through Hyperactivation of Lipogenesis
Source: Oxford University Press journal article supplement (doi:10.2337/db06-1059), 2007-05-25
Supplement: db061059-sup-db1059onlineappendix.doc [file db061059-sup-db1059onlineappendix.doc]

**SUPPLEMENT FIG. 1. Expression levels of LXR and LXR mRNA in pancreatic islets & INS-1.** (*A*) The indicated tissues were dissected from 10-week-old SD rats, and pancreatic islets were isolated by ductal collagenase injection. Total RNA was isolated, and the mRNA levels of the indicated genes were analyzed by semi-quantitative RT-PCR analysis. (*B*) Pancreatic islets were isolated from 12-week-old SD rats (n=4) and C57BL/6 mice (n=4), and 8-week-old ZDF rats (n=3). The mRNA levels of LXR LXR, and GAPDH were analyzed by real-time qPCR.

**SUPPELEMENT FIG. 2. Lipogenic gene expression in -cells is increased by LXR agonists, T0901317 and GW3965.** (*A*) INS-1 cells were treated with different concentrations (0.1 M, 1 M, and 10 M) of T0901317 (*A*) or GW3965 (*B*) for 36 h. Total RNA was isolated and analyzed for the level of lipogenic gene expression by real-time qPCR. The relative amount of each mRNA was normalized to cyclophilin levels. ABCA1 was used as positive control for LXR activation.

**SUPPLEMENT FIG. 3. High glucose condition accelerates LXR-induced pancreatic islet apoptosis.** After pancreatic islets were incubated for 3 days in the presence or absence of T0901317 in a low- (11.2 mM) or high-glucose medium (31.2 mM), TUNEL assays and peroxidase staining were conducted to detect apoptotic cells.

**SUPPLEMENT FIG. 4. High glucose condition increases LXR transcriptional activity.** INS-1 cells were transfected with LXR (500 ng) in the presence of a LXRE-luciferase reporter gene. After preincubation for 12 hrs in 2.5 mM glucose medium, transfected cells were incubated for 24 hrs in the absence (□) or presence (■) of T0901317 (10 M) in various glucose media and then were harvested for luciferase reporter assay.
